# Supplementary material
Source: publisher figshare collection journal article supplement (https://acs.figshare.com/ndownloader/files/3766336)
Supplement: Supplementary file 1 [file 3766336]

compound	SMILE	IDH1 R132H Ki (¦ÌM)	IDH1 R132H Ki (¦ÌM)	IDH1 WT Ki (¦ÌM)
1	CC1=NC=CN1CC(N(C2=CC(F)=CC=C2)C(C3=C(C)C=CC=C3)C(NC4CCCCC4)=O)=O
2	O=C1C=C(C)C=C(CC2=CC=CC=C2)N1O
3	OC1=C(CN2C=CN=C2)C=C(C(C)(C)CC(C)(C)C)C=C1CN3C=NC=C3
4	S=C(N/C1=C/C2=CC(O)=C(O)C=C2)N(CC3=CC=CC=C3)C1=O
5	S=C(N/C1=C/C2=CC(OC)=C(OC)C=C2)N(CC3=CC=CC=C3)C1=O	>50
6	S=C(N/C1=C/C2=CC(OC)=C(OC)C=C2)N(C3=CC=CC=C3)C1=O	>50
7	S=C(N/C1=C/C2=CC(OC)=C(OC)C=C2)N(CC3=CC=C(OC)C=C3)C1=O	>50
8	S=C(N/C1=C/C2=CC(O)=C(O)C=C2)N(C3=CC=CC=C3)C1=O	16.7
9	S=C(N/C1=C/C2=CC(O)=C(O)C=C2)N(CC3=CC=C(O)C=C3)C1=O	13.4
10	S=C(N/C1=C/C2=CN=CC=C2)N(CC3=CC=CC=C3)C1=O	>50
11	S=C(N/C1=C/C2=CN=C(OC)C=C2)N(CC3=CC=CC=C3)C1=O	>50
12	S=C(N/C1=C/C2=CNC(C=C2)=O)N(CC3=CC=CC=C3)C1=O	4.8
13	S=C(N/C1=C/C2=CN=C(OC)C=C2)N(CC)C1=O	9.2
14	S=C(N/C1=C/C2=CNC(C=C2)=O)N(CC)C1=O	3.6
15	S=C(N/C1=C/C2=CN=C(OC)C=C2)N(C)C1=O	25
16	S=C(N/C1=C/C2=CNC(C=C2)=O)N(C)C1=O	0.75	1.2	8.8
17	S=C(N/C1=C/C2=CN=C(OC)C=C2)NC1=O	7.8
18	S=C(N/C1=C/C2=CNC(C=C2)=O)NC1=O	0.42	2.3	10.3
19	S=C(N/C1=C/C2=CN=C(OC)C=C2)N(CC(O)=O)C1=O	>50
20	S=C(N/C1=C/C2=CNC(C=C2)=O)N(CC(O)=O)C1=O	>50
21	S=C(N/C1=C/C2=CN(C)C(C=C2)=O)N(C)C1=O	0.47
22	S=C(N/C1=C/C2=CN(CC3=CC=CC=C3)C(C=C2)=O)N(C)C1=O	4.6	12.5	32.9
23	S=C(N/C1=C/C2=C[N+]([O-])=C(OC)C=C2)N(C)C1=O	4.3
24	S=C(N/C1=C/C2=CN(O)C(C=C2)=O)N(C)C1=O	5.9
25	S=C(N/C1=C/C2=C(OC)N=CC=C2)N(C)C1=O	25.3
26	S=C(N/C1=C/C2C(N=CC=C2)=O)N(C)C1=O	>50
27	S=C(N/C1=C/C2=NC(OC)=CC=C2)N(C)C1=O	34.2
28	S=C(N/C1=C/C(N2)=CC=CC2=O)N(C)C1=O	11.3
29	S=C(N/C1=C/C2=CC=NC=C2)N(C)C1=O	>50
30	S=C(N/C1=C/C2=CC(OC)=NC=C2)N(C)C1=O	2.6
31	S=C(N/C1=C/C2=CC(NC=C2)=O)N(C)C1=O	9.2
32	S=C(N/C1=C/C2=CC(Br)=NC=C2)NC1=O	>50
33	S=C(N/C1=C/C2=CC(C3=CC=CC=C3)=NC=C2)NC1=O	5.6
34	S=C(N/C1=C/C2=CC=C(C3=CC=C(F)C(F)=C3)O2)N(C)C1=O	3.2
35	S=C(S/C1=C/C2=CN=C(OC)C=C2)NC1=O	>50
36	S=C(S/C1=C/C2=CNC(C=C2)=O)NC1=O	3.1
37	O=C(N/C1=C/C2=CN=C(OC)C=C2)NC1=O	>50
38	O=C(N/C1=C/C2=CNC(C=C2)=O)NC1=O	>50
39	NC(NC/1=O)=NC1=C\C2=CNC(C=C2)=O	>50
40	O=C(NC(SC)=N/1)C1=C/C2=CNC(C=C2)=O	>50
41	S=C(N(C)/C1=C/C2=CNC(C=C2)=O)N(C)C1=O	16.5
